# Supplementary material for: Optimization of pilot-scale re-mineralization by calcite dissolution using sulfuric acid for seawater desalination processes
Source: Royal Society of Chemistry journal article supplement (doi:10.1039/d2ew00768a), 2022-12-19
Supplement: d2ew00768a1.pdf [file d2ew00768a1.pdf]

## Supplementary Information

### Optimization of the pilot-scale re-mineralization by calcite dissolution using sulfuric acid for seawater desalination processes

Sungil Lim\* and Yu Chang Kim

*Department of Sustainable Environment Research, Eco-friendly Energy Conversion Research Division, Korea Institute of Machinery and Materials (KIMM), Daejeon 34103, Republic of Korea*

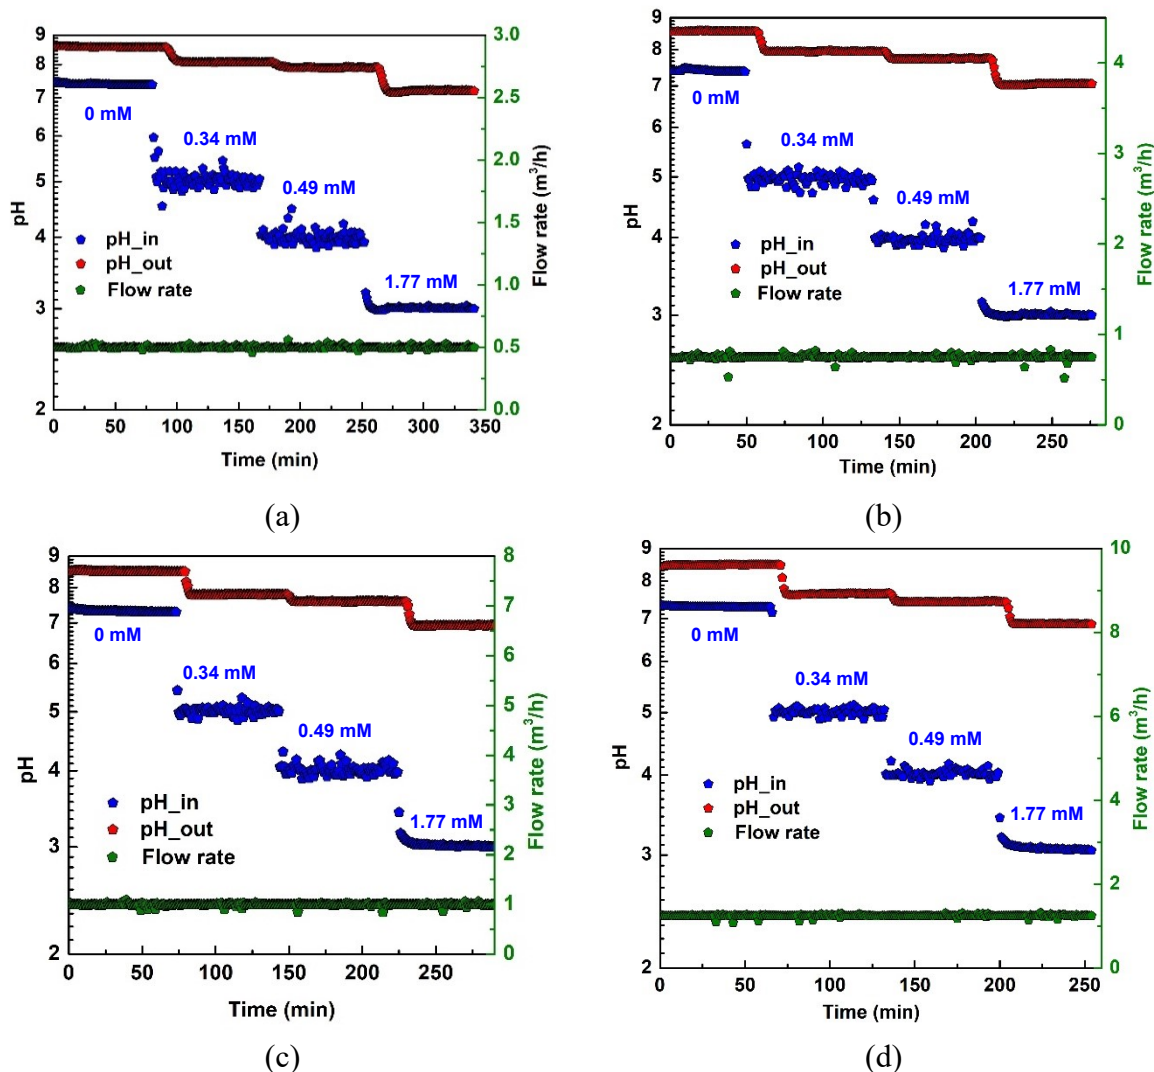

**Figure. S1** Changes in pH and flow rate as a function of time (acid concentration) at the flow rates of 0.5 m<sup>3</sup>/h (a), 0.75 m<sup>3</sup>/h (b) 1.0 m<sup>3</sup>/h (c) 1.25 m<sup>3</sup>/h (d) recorded by the online data acquisition in the calcite dissolution system.

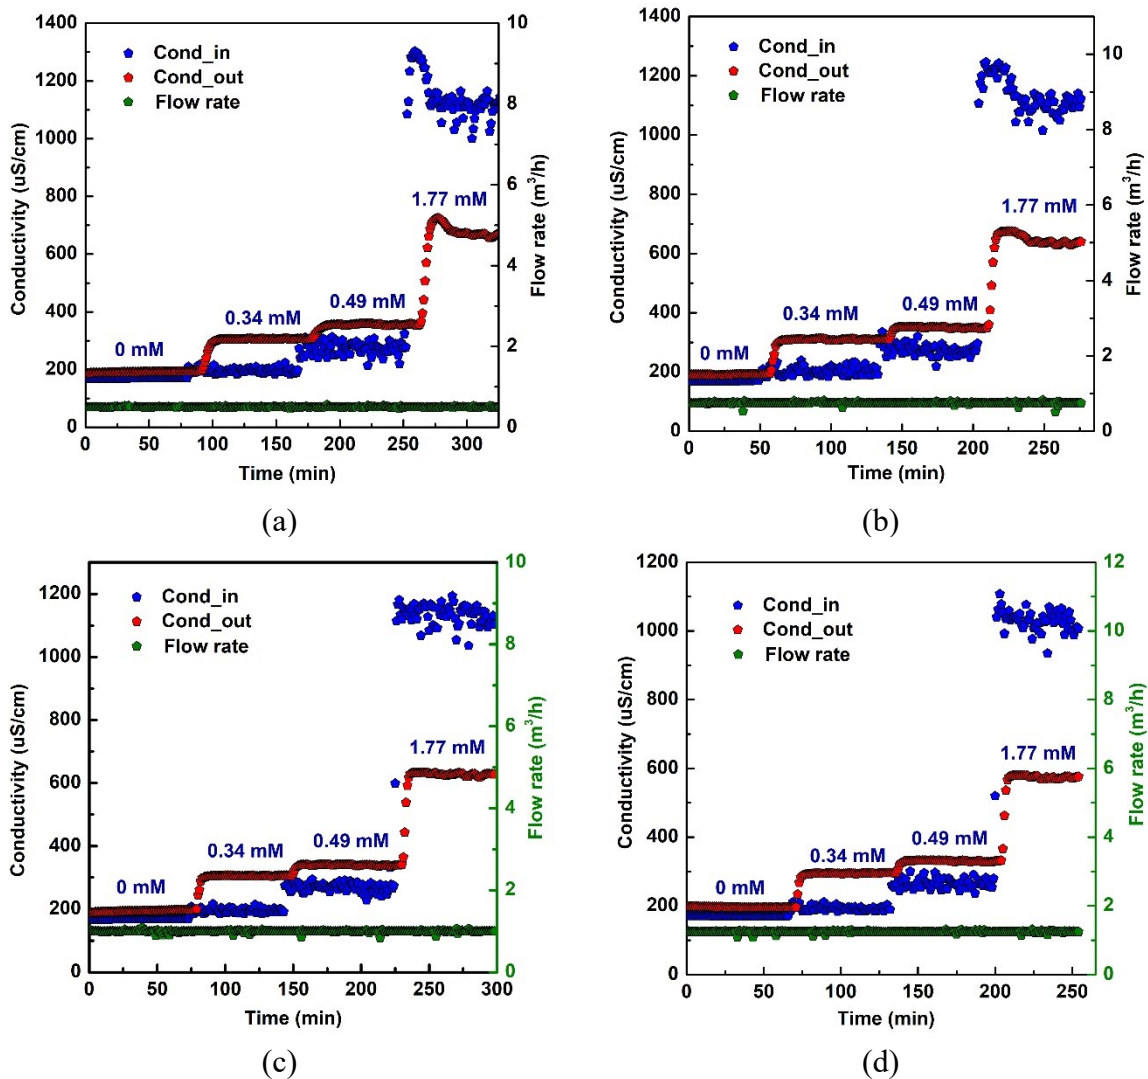

**Figure. S2** Changes in conductivity and flow rate as a function of time (acid concentration) at the flow rates of 0.5 m<sup>3</sup>/h (a), 0.75 m<sup>3</sup>/h (b) 1.0 m<sup>3</sup>/h (c) 1.25 m<sup>3</sup>/h (d) recorded by the online data acquisition in the calcite dissolution system.

**Table. S1** Ion concentration of the heavy metal elements in the produced water according to different surfuric acid concentration in the acidification.

| Sulfuric acid concentration (mM) | Ion concentration of the heavy metal elements in permeate water ( $\mu\text{g/L}$ ) |      |      |      |      |      |      |      |      |
|----------------------------------|-------------------------------------------------------------------------------------|------|------|------|------|------|------|------|------|
|                                  | Pb                                                                                  | As   | Cs   | Hg   | Cr   | Cd   | Ni   | Sb   | Fe   |
| 0                                | N.D.                                                                                | N.D. | N.D. | N.D. | N.D. | N.D. | N.D. | N.D. | N.D. |
| 0.34                             | N.D.                                                                                | N.D. | N.D. | N.D. | N.D. | N.D. | N.D. | N.D. | N.D. |
| 0.49                             | N.D.                                                                                | N.D. | N.D. | N.D. | N.D. | N.D. | N.D. | N.D. | N.D. |
| 1.77                             | N.D.                                                                                | N.D. | N.D. | N.D. | N.D. | N.D. | N.D. | N.D. | N.D. |

\*N.D. = not detected
